# Supplementary material
Source: PubMed Central journal article supplement (PMC3525306)
Supplement: supp_WNL.0b013e3182698cab_Chronic_Pain_FINAL.pdf [file supp_WNL.0b013e3182698cab_Chronic_Pain_FINAL.pdf]

## Chronic pain as a manifestation of potassium channel-complex autoimmunity

الألم المزمن كمظهر من مظاهر المناعة الذاتية لمركب قناة البوتاسيوم

### [ملخص]

الهدف من الدراسة: الأجسام المضادة التي تستهدف مركبات بوابات الجهد لقناة البوتاسيوم (VGKC) تسبب طيف من اضطرابات الاستثارة العصبية المفرطة. نحن بحثنا الألم كمظهر من مظاهر المناعة الذاتية لمركب قناة البوتاسيوم .

طرق الدراسة: استعرضنا مدى انتشار الألم وخصائصه عند المرضى حاملي المصل الموجب للمجمع المناعي (مفتش ج) (IgG) الخاص بمركب بوابات الجهد لقناة البوتاسيوم (VGKC) خلال 25 شهرا من التجارب الشاملة حول الأجسام المضادة العصبية و خصوصيات الأنواع الفرعية ايجابية المصل الخاصة ب LGI1-IgG و CASPR2-IgG، كما استعرضنا انتشار الألم لدى مجموعة مراقبة من مرضى المناعة الذاتية

نتائج الدراسة: تم تحديد VGKC-IgG في مجمع 1992 مريض من بين 54853 مريض تم اختبارهم (4%). من بين 316 مريض تم تقييمهم عصبيا في مايو كلينيك، 159 (50%) مريض كانوا يعانون الألم، إما في عزلة (28%) أو مع مظاهر عصبية مصاحبة (72%)، والسبب لا يعزى إلى بديل. كان الألم تحت الحاد في البداية، مزمنًا في مساره، يتخذ شكل ألم الأعصاب، إقليميا في توزيعه، أو منتشر ويعزى أحيانا إلى فيبروميالغيا (6%) أو سبب نفسي (13%). معظم المرضى كان الجهاز العصبي الطرفي لديهم ذا وظيفة طبيعية، وتقاس هذه الوظيفة بدرجات ضعف الأعصاب والتوصيل العصبي. كانت أدلة فرط الاستثارة العصبية (فرط العرق، فرط كمية حرارة من الألم) 25 ضعفا أكثر شيوعا في المرضى الذين يعانون من الألم. ولقد تطلب علاج الألم أدوية متعددة في 70% من المرضى (المخدرات، 30%) وذكرت الدراسة انه 13 من بين 16 مريضا تم تخفيف الألم مع العلاج المناعي. كان الألم مرتبطا بشكل ملحوظ بالمصل الموجب لمفتش CASPR2-Ig G (16% إيجابية مع الألم، و 7% دون الألم، P = 0.014) ولكن ليس مع مفتش-LGI1. وذكرت الدراسة أنه أقل من 10% من 167 مريضا الذين يعانون من الألم يحملون أجسام مضادة عصبية مغايرة لمفتش G لمركب بوابات الجهد لقناة البوتاسيوم مفتش (VGKC).

الاستنتاجات: يعد الألم المزمن التلقائي مجهول السبب مظهرا متلازما لمرض المناعة الذاتية لقنوات البوتاسيوم المعقدة. و هو ناتج عن فرط الاستثارة للمسارات العصبية. يتلازم CASPR2-IgG بشكل كبير مع الألم، ولكن عند اغلبية المرضى، لازل يتعين تحديد جزيء المستضدي لمركب VGKC

**Objective:** Autoantibodies targeting voltage-gated potassium channel (VGKC) complexes cause a spectrum of neuronal hyperexcitability disorders. We investigated pain as a manifestation of VGKC-complex autoimmunity.

**Methods:** We reviewed the prevalence and characteristics of pain in VGKC-complex-immunoglobulin G (IgG)-seropositive patients in 25 months of comprehensive service testing for neural autoantibodies, subtyped positive sera for LGI1-IgG and CASPR2-IgG specificities, and reviewed pain prevalence in autoimmune control patients.

**Results:** VGKC-complex-IgG was identified in 1,992 patients of 54,853 tested (4%). Of 316 evaluated neurologically at Mayo Clinic, 159 (50%) had pain, in isolation (28%) or with accompanying neurologic manifestations (72%), and not attributable to alternative cause. Pain was subacute in onset, chronic in course, neuropathic, nociceptive, regional, or diffuse and sometimes attributed to fibromyalgia (6%) or psychogenic cause (13%). Most patients had normal peripheral nervous system function, measured by neuropathy impairment scores and nerve conduction. Evidence of neuronal hyperexcitability (hyperhidrosis, quantitative heat-pain hyperalgesia, or electromyographic excitability) was 25-fold more common in pain patients. Pain management required multiple medications in 70% (narcotics, 30%); 13 of 16 patients reported pain relief with immunotherapy. Pain was significantly associated with CASPR2-IgG-positivity (16% positive with pain, 7% without pain;  $p = 0.014$ ) but not with LGI1-IgG. Less than 10% of 167 patients with neural autoantibodies other than VGKC-complex-IgG reported pain.

**Conclusions:** Chronic idiopathic pain is a syndromic manifestation of VGKC-complex autoimmunity. Hyperexcitability of nociceptive pathways is implicated. CASPR2-IgG significantly associates with pain, but in most patients the antigenic VGKC-complex molecule remains to be determined. VGKC-complex autoimmunity represents an important new direction for pain research and therapy.

---

**Translator:** Wessam Fathy MD, Mansoura Medical School, Neurology, Mansoura, Egypt

**Translation Reviewer:** Latifa Boukarrou MD, Louisiana State University Health Science Center, Neurology, Shreveport, LA
