# Supplementary material
Source: PubMed Central journal article supplement (PMC3525306)
Supplement: supp_WNL.0b013e3182698cab_Figure_e-1.pdf [file supp_WNL.0b013e3182698cab_Figure_e-1.pdf]

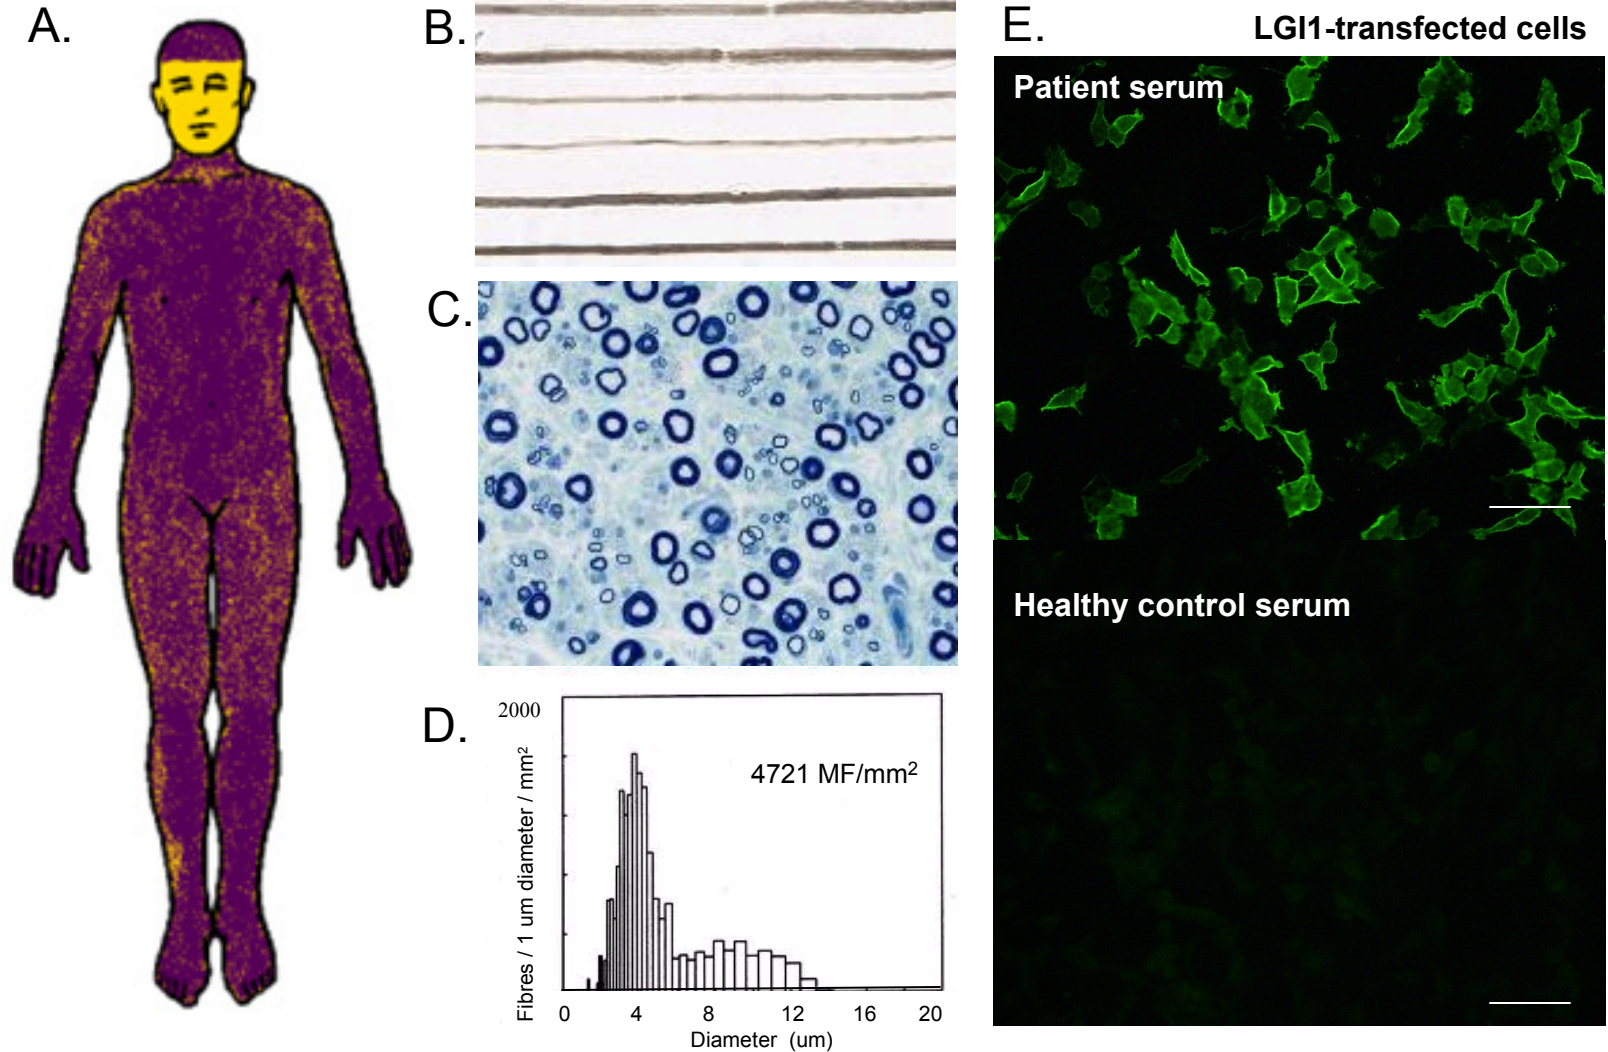

**Figure e-1:** Illustrative VGKC-IgG-seropositive case 1 (table 3). (A) Thermoregulatory sweat test revealed early sweat with preserved sudomotor small c-fiber function (quantitative sensory testing revealed heat-pain hyperalgesia). (B-D) Sural nerve biopsy. No structural abnormalities of axons, myelin or Schwann cells were evident in teased nerve fibers (B) or semithin epoxy section (C). Morphometric analysis of myelinated fibers (MF) was normal (D). (E) Indirect immunofluorescence. Patient's serum IgG bound to LGI1-transfected cells; healthy control serum did not (bar, 20  $\mu$ m).
